# Supplementary material for: Simultaneous axial screw dislocation-mediated growth and radial layer-by-layer deposition for controlled synthesis of asymmetric axial ZnO nanospindles
Source: Royal Society of Chemistry journal article supplement (doi:10.1039/c4nr01888e), 2014-05-23
Supplement: c4nr01888e1.pdf [file c4nr01888e1.pdf]

## **Supplementary Information**

### **Simultaneous axial screw dislocation mediated growth and radial layer-by-layer deposition for controlled synthesis of asymmetric axial ZnO nanospindles**

*Hong-Jie Yang, Sheng-Yan He, and Hsing-Yu Tuan\**

Department of Chemical Engineering, National Tsing Hua University, 101, Section 2, Kuang-Fu  
Road, Hsinchu, Taiwan 30013, ROC.

#### **\*Corresponding Author**

Hsing-Yu Tuan, Department of Chemical Engineering, National Tsing Hua University, Hsinchu,  
Taiwan, 30013

Tel.: + 886-3-572-3661

Fax: + 886-3-571-5408

E-mail address: [hytuan@che.nthu.edu.tw](mailto:hytuan@che.nthu.edu.tw)

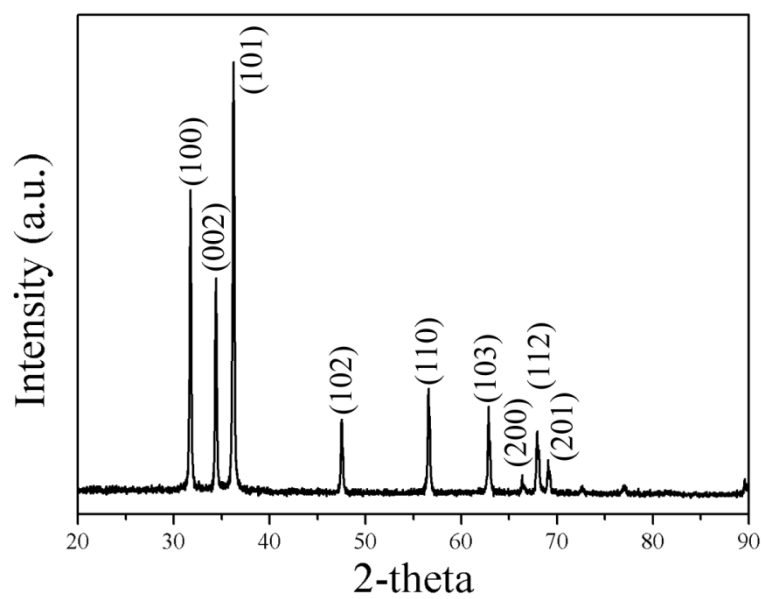

**Fig. S1** XRD pattern of ZnO nanospindles fabricated at molar injection rate of 0.72 mmol/min, reaction time of 40 min, and 330 °C .

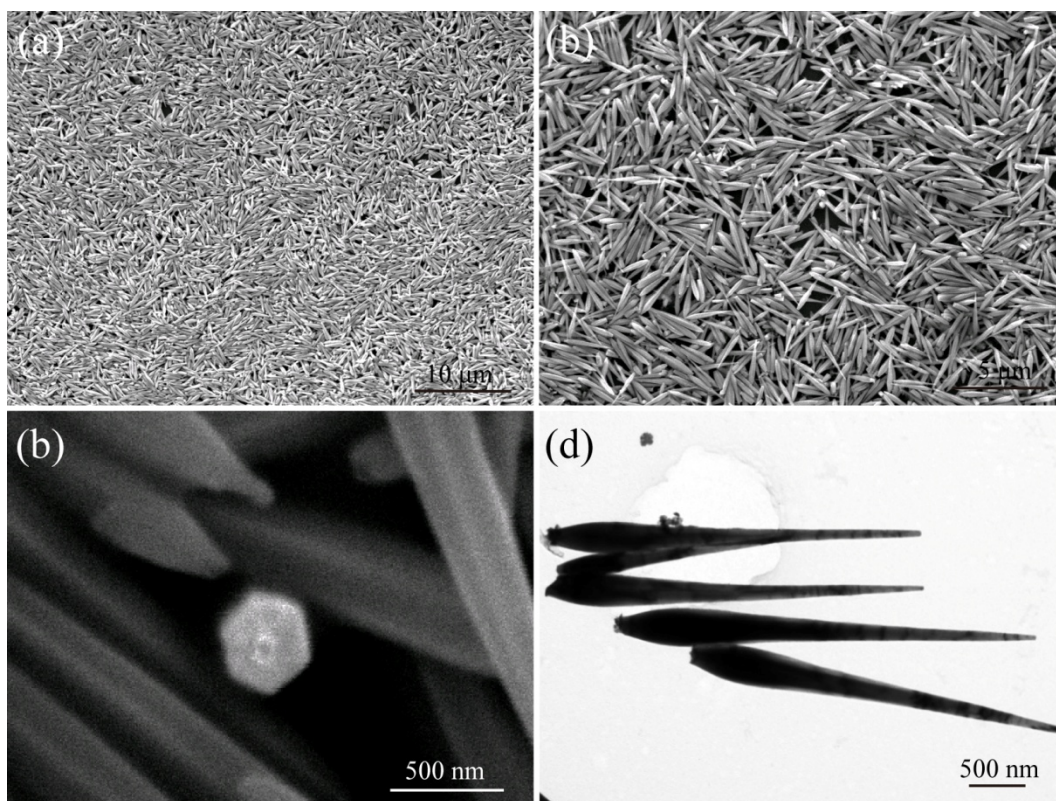

**Fig. S2** SEM and TEM images of ZnO nanospindles generated at 330 °C by supercritical fluid equipment

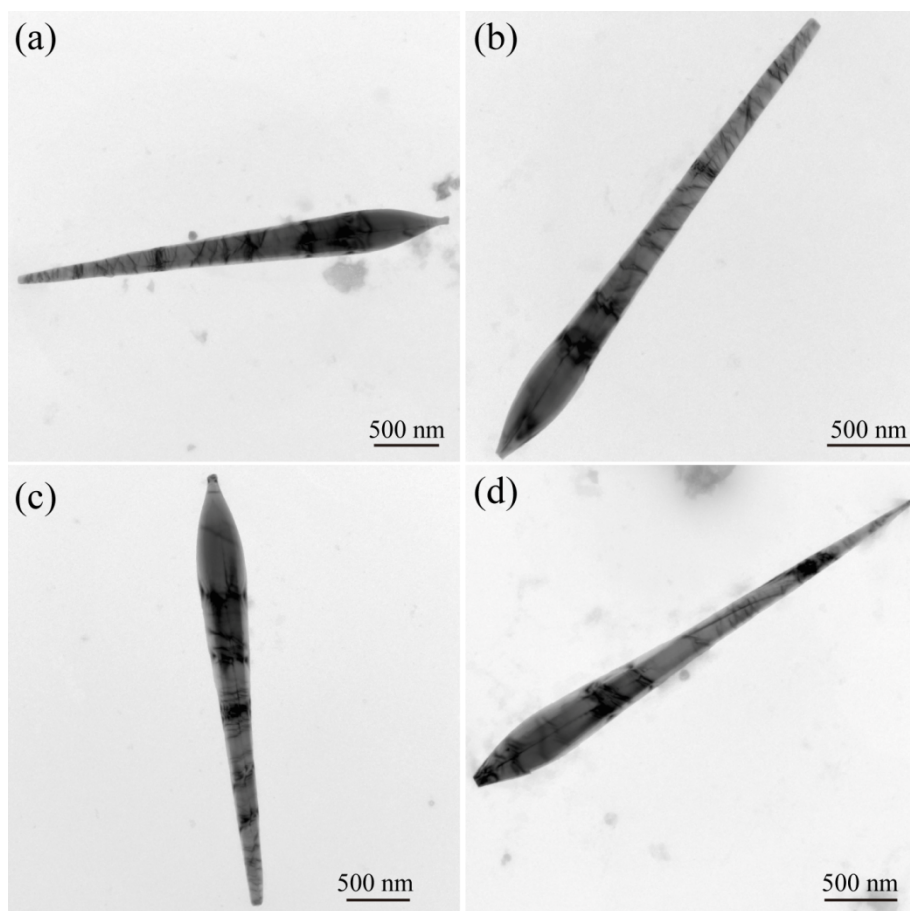

**Fig. S3** TEM images of ZnO nanospindles
